# Supplementary material for: Changing Trends in Nutritional Behavior among University Students in Greece, between 2006 and 2016
Source: PubMed Central journal article supplement (PMC5793292; doi:10.3390/nu10010064), 2018-01-10
Supplement: nutrients-10-00064-s001.pdf [file nutrients-10-00064-s001.pdf]

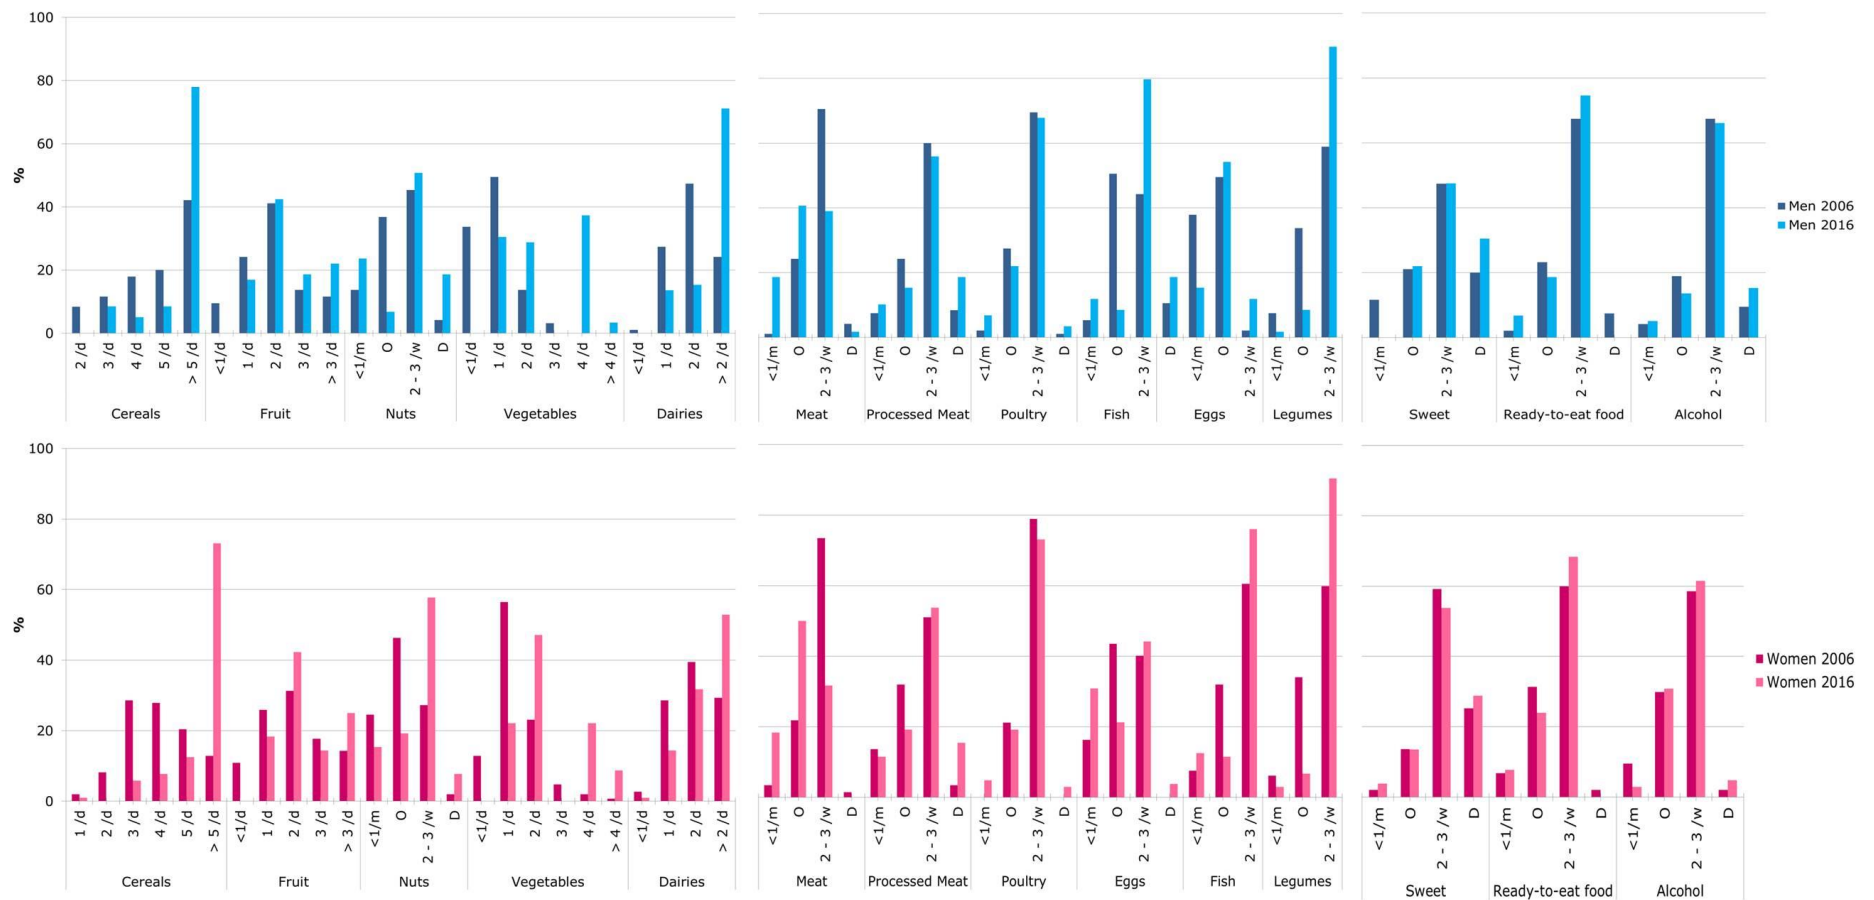

Figure S1: Dietary habits of male and female students in 2006 (men:  $n = 95$ , women:  $n = 147$ ) and 2016 (men:  $n = 59$ , women:  $n = 104$ ).
